# 1 Identification of TMEM106B as proviral host factor for SARS-CoV-2

2 Jim Baggen<sup>1</sup>, Leentje Persoons<sup>1,3</sup>, Sander Jansen<sup>1,3</sup>, Els Vanstreels<sup>1,4</sup>, Maarten Jacquemyn<sup>1,4</sup>, Dirk

3 Jochmans<sup>1</sup>, Johan Neyts<sup>1</sup>, Kai Dallmeier<sup>1</sup>, Piet Maes<sup>2</sup>, Dirk Daelemans<sup>1,5</sup>

4 <sup>1</sup>KU Leuven Department of Microbiology, Immunology and Transplantation, Laboratory of Virology  
5 and Chemotherapy, Rega Institute, 3000 Leuven, Belgium

6 <sup>2</sup>KU Leuven Department of Microbiology, Immunology and Transplantation, Laboratory of Clinical  
7 and Epidemiological Virology, Rega Institute, 3000 Leuven, Belgium

8 <sup>3,4</sup>These authors contributed equally to this work

9 <sup>5</sup>Lead contact

10 \*Correspondence: [jim.baggen@kuleuven.be](mailto:jim.baggen@kuleuven.be), [dirk.daelemans@kuleuven.be](mailto:dirk.daelemans@kuleuven.be)

11

## 12 SUMMARY

13 The ongoing COVID-19 pandemic is responsible for worldwide economic damage and nearly one  
14 million deaths. Potent drugs for the treatment of severe SARS-CoV-2 infections are not yet available.

15 To identify host factors that support coronavirus infection, we performed genome-wide functional  
16 genetic screens with SARS-CoV-2 and the common cold virus HCoV-229E in non-transgenic human  
17 cells. These screens identified PI3K type 3 as a potential drug target against multiple coronaviruses. We  
18 discovered that the lysosomal protein TMEM106B is an important host factor for SARS-CoV-2  
19 infection. Furthermore, we show that TMEM106B is required for replication in multiple human cell  
20 lines derived from liver and lung and is expressed in relevant cell types in the human airways. Our  
21 results identify new coronavirus host factors that may potentially serve as drug targets against SARS-  
22 CoV-2 or to quickly combat future zoonotic coronavirus outbreaks.

23

## 24 INTRODUCTION

25 The recent pandemic of Severe Acute Respiratory Syndrome-Coronavirus-2 (SARS-CoV-2), the  
26 causative agent of COVID-19 (Coronavirus Disease 2019), has caused a worldwide health crisis with  
27 more than 33,000,000 confirmed infections and almost one million deaths, with numbers still rising  
28 (Dong et al., 2020). As for today, only two drugs have shown some clinical efficacy for the treatment of  
29 COVID-19 patients. The investigational antiviral drug remdesivir has been temporarily approved by  
30 authorities for emergency use on hospitalized patients with severe COVID-19, as it was shown in clinical  
31 trials to shorten the time to recovery in some cases (Beigel et al., 2020). Dexamethasone, an affordable  
32 and widely available steroid, can reduce mortality by one-third among patients critically ill with  
33 COVID-19, by suppressing the hyperactive inflammatory immune response these patients suffer from in  
34 response to viral infection (Horby et al., 2020). Since both treatments only seem to benefit severe cases  
35 of COVID-19 and only to some limited extent, there is still an urgent need for efficient and safe  
36 therapeutic options to treat infected people while awaiting the development and worldwide  
37 implementation of safe and effective vaccines to halt the pandemic.

38 Coronaviruses are enveloped positive-sense RNA viruses that contain large genomes of up to 33.5 kb  
39 and have characteristic club-shaped spikes projecting from their virion surface (Fehr and Perlman,  
40 2015). Coronaviruses cause respiratory and intestinal infections in a broad range of mammals and birds.  
41 Seven human coronaviruses (HCoVs) have been identified so far, which likely all emerged as zoonosis  
42 from bats, mice or domestic animals (Ye et al., 2020). The four so-called ‘common cold HCoVs’ are the  
43 alphacoronaviruses 229E and NL63, and betacoronaviruses OC43 and HKU1, which only cause mild  
44 upper respiratory tract illnesses (Liu et al., 2020). In contrast, the betacoronaviruses SARS-CoV, MERS-  
45 CoV and the recently emerged SARS-CoV-2, are highly pathogenic and can cause severe, potentially  
46 lethal respiratory infections. Since a large diversity of coronavirus types resides in animals and  
47 interspecies transmission frequently occurs (Chan et al., 2013; Cui et al., 2019; Ye et al., 2020), there is  
48 a high likelihood for the emergence of new pathogenic coronaviruses that can spread into the human  
49 population to pandemic proportions, as exemplified by the recent outbreak of SARS-CoV-2. Despite  
50 this risk and its great economic and social impact, our options to prevent or treat coronavirus infections

51 remain very limited. Hence, the development of broad-spectrum antiviral drugs against members of this  
52 virus family could help not only to address the current high medical need, but also to quickly combat  
53 and contain zoonotic events in the future.

54 To develop such drugs, it is crucial to understand which host factors coronaviruses require to infect a  
55 cell, as in principle each step of the coronavirus replication cycle (receptor binding, endocytosis, fusion,  
56 translation of viral replication proteins and structural proteins, genome replication, virion assembly and  
57 release), may serve as target for antiviral intervention. While the viral entry step of coronaviruses has  
58 been relatively well characterized, the host-virus interplay in later steps of the viral life cycle remains  
59 largely elusive. For SARS-CoV-2, previous studies have shown that the protein angiotensin-converting  
60 enzyme 2 (ACE2) can serve as a receptor in Vero E6 cells (Wei et al., 2020) or in human cells  
61 overexpressing ACE2 (Hoffmann et al., 2020; Zhou et al., 2020; Zhu et al., 2020). In addition, it was  
62 shown that the SARS-CoV-2 spike (S) can be primed for fusion by cellular proteases such as furin,  
63 transmembrane serine protease 2 (TMPRSS2) and cathepsin B or L, depending on the target cell type  
64 (Hoffmann et al., 2020; Shang et al., 2020).

65 In this study, we performed a series of genome-wide CRISPR-based genetic screens in human cells to  
66 identify host factors required for SARS-CoV-2 and HCoV-229E infection. We identified PI3K type 3  
67 as a common host factor for SARS-CoV-2, HCoV-229E, and HCoV-OC43, and show that small  
68 molecules targeting this protein might serve as broadly applicable anti-coronavirus inhibitors.  
69 Furthermore, we discovered that the lysosomal protein TMEM106B serves as an important specific host  
70 factor for SARS-CoV-2 infection in multiple liver- and lung-derived human cell lines.

71

## 72 **RESULTS**

### 73 **Genome-wide knockout screens in human cells identify host factors for HCoV-229E and SARS-** 74 **CoV-2**

75 Genome-wide knockout screens have been widely used to identify host factors for various viruses (Flint  
76 et al., 2019; Li et al., 2020) but the only coronavirus for which genome-wide knockout screens have

77 been performed to date is SARS-CoV-2. These screens were performed either in the African green  
78 monkey cell line Vero E6, or in human cells that were engineered to overexpress ACE2. Here, we chose  
79 to perform a CRISPR-based genome-wide knockout screen in human cells without introducing an  
80 exogenous receptor. To that end, we used the human liver cell line Huh7 in which our clinical isolate of  
81 SARS-CoV-2 was naturally able to induce a clear cytopathic effect (CPE). We performed screens with  
82 both SARS-CoV-2 as well as the less pathogenic HCoV-229E (**Figure 1A-D**). This allowed us to  
83 identify both (i) broad-spectrum coronavirus host factors as well as (ii) specific host factors for SARS-  
84 CoV-2 and HCoV-229E. Huh7 cells were transduced with the Brunello genome-wide library (Doench  
85 et al., 2016), treated with puromycin to eliminate untransduced cells, and then selected for survival  
86 during infection with either coronavirus, followed by sgRNA identification in the remaining cell  
87 population by deep sequencing for target deconvolution. We performed high stringency screens for  
88 HCoV-229E (**Figure 1B**) and SARS-CoV-2 (**Figure 1C**) by exposing cells to the virus until nearly all  
89 cells had died. For SARS-CoV-2, we also performed a lower stringency screen (**Figure 1D**) to identify  
90 genes with a more subtle effect on viral infection. However, low stringency screens may have an  
91 increased background and rather select for genes related to cell proliferation or general stress responses.  
92 The high stringency SARS-CoV-2 screen (**Figure 1C**) identified one significantly enriched gene,  
93 *TMEM106B*, while a larger number of genes was enriched in the low stringency screen (**Figure 1B**). In  
94 contrast to previously published genome-wide screens with SARS-CoV-2, our screen did not identify  
95 *ACE2*. This difference is probably due to the fact that previous screens were performed in human cells  
96 that overexpress ACE2 (Heaton et al., 2020; Zhu et al., 2020) or in Vero E6 cells (Wei et al., 2020).  
97 Vero E6 cells express high levels of ACE2, whereas ACE2 is expressed at very low levels in Huh7 cells  
98 and several human airway cell lines (Clausen et al., 2020) (**Figure S1**). Yet, our screen with HCoV-  
99 229E identified *ANPEP* (**Figure 1C**), which encodes the well-known HCoV-229E receptor  
100 aminopeptidase N (AP-N). Comparison of the screens pointed towards *PIK3C3* and *TMEM41B* as  
101 common genes that were identified for both viruses, and we therefore selected these genes, as well as  
102 *TMEM106B*, for further validation.

103

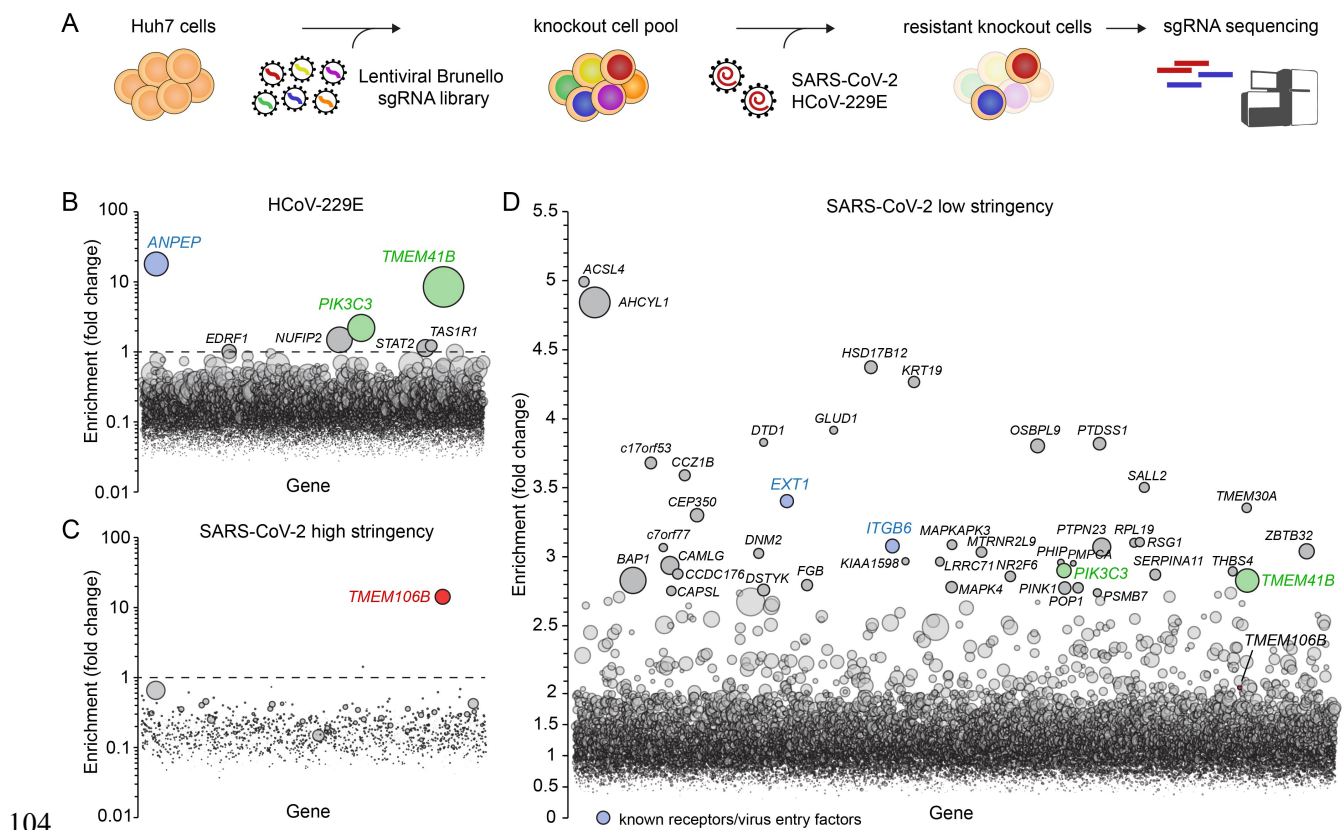

104

105 **Figure 1.** Genome-wide knockout screens in human cells identify host factors for SARS-CoV-2 and HCoV-229E  
 106 infection. **A)** Overview of experimental steps performed during a genome-wide screen for coronavirus host factors.  
 107 **B-D)** Genome-wide knockout screens were performed in Huh7 cells, with strong selection (high stringency) using  
 108 HCoV-229E (B) and SARS-CoV-2 (C) or with mild SARS-CoV-2 selection (low stringency) (D). Each circle  
 109 represents a gene, with size corresponding to significance of enrichment. The y-axis shows the enrichment of  
 110 sgRNAs after virus selection compared to an uninfected control population (D) or the population on the first day  
 111 of the screen prior to infection (B and C). Genes distributed on the x-axis in alphabetical order.

112

### 113 **PI3K type 3 is a druggable target against SARS-CoV-2 and other coronavirus infections**

114 *PIK3C3* encodes PI3K type 3, the catalytic subunit of the PI3K complex that mediates the formation of  
 115 phosphatidylinositol 3-phosphate and plays a role in many processes, including endocytic trafficking  
 116 and the initiation and maturation of autophagosomes (Backer, 2016). Because *PIK3C3* is essential for  
 117 cell survival (<https://depmap.org/portal/depmap/>), generation of PI3K type 3 null cells for genetical hit  
 118 validation is not possible. We therefore confirmed the role of this factor in coronavirus infection instead  
 119 by using the pharmacological inhibitors VPS34-IN1, VPS34-IN2, SAR405, and autophinib, which are  
 120 structurally distinct inhibitors directly targeting PI3K type 3 (Bago et al., 2014; Pasquier et al., 2015;  
 121 Robke et al., 2017; Ronan et al., 2014). As expected, all PI3K type 3 inhibitors inhibited the formation  
 122 of LC3-positive autophagosome puncta and induced large vacuoles in treated cells (**Figure S2A**) (Ronan

123 et al., 2014). PI3K type 3 inhibitors showed antiviral activity against SARS-CoV-2 in Vero E6 cells  
124 (**Figure 2A**) and Huh7 cells (**Figure 2B**) and were also active against HCoV-OC43 (**Figure 2C**) and  
125 the more distantly related alphacoronavirus HCoV-229E (**Figure 2D**). A time series experiment showed  
126 that inhibition of HCoV-229E by SAR405 occurs later in the viral life cycle than the attachment stage,  
127 as benchmarked by use of the attachment inhibitor UDA, and earlier than onset of intracellular  
128 replication as identified by use of remdesivir, an inhibitor of viral RNA synthesis (**Figure S2B**). This  
129 suggests a role of PI3K type 3 in an early step of the viral life cycle, but downstream of receptor binding.

130 Since PI3K type 3 is involved in autophagosome formation, we investigated whether macroautophagy  
131 is required for SARS-CoV-2 and HCoV-229E infection. Huh7 cells expressing a pool of four sgRNAs  
132 targeting *ATG5* or *ATG7*, which are required for phagophore expansion (Dikic and Elazar, 2018), were  
133 unable to form LC3-positive autophagosomes (**Figure S2C**), indicating that the macroautophagy  
134 pathway was disrupted. However, *ATG5* and *ATG7* disruption did not affect the induction of CPE by  
135 SARS-CoV-2 or HCoV-229E (**Figure 2E**). Together, these results show that SARS-CoV-2 and other  
136 coronaviruses employ PI3K type 3 for infection, but do not depend on a functional macroautophagy  
137 pathway.

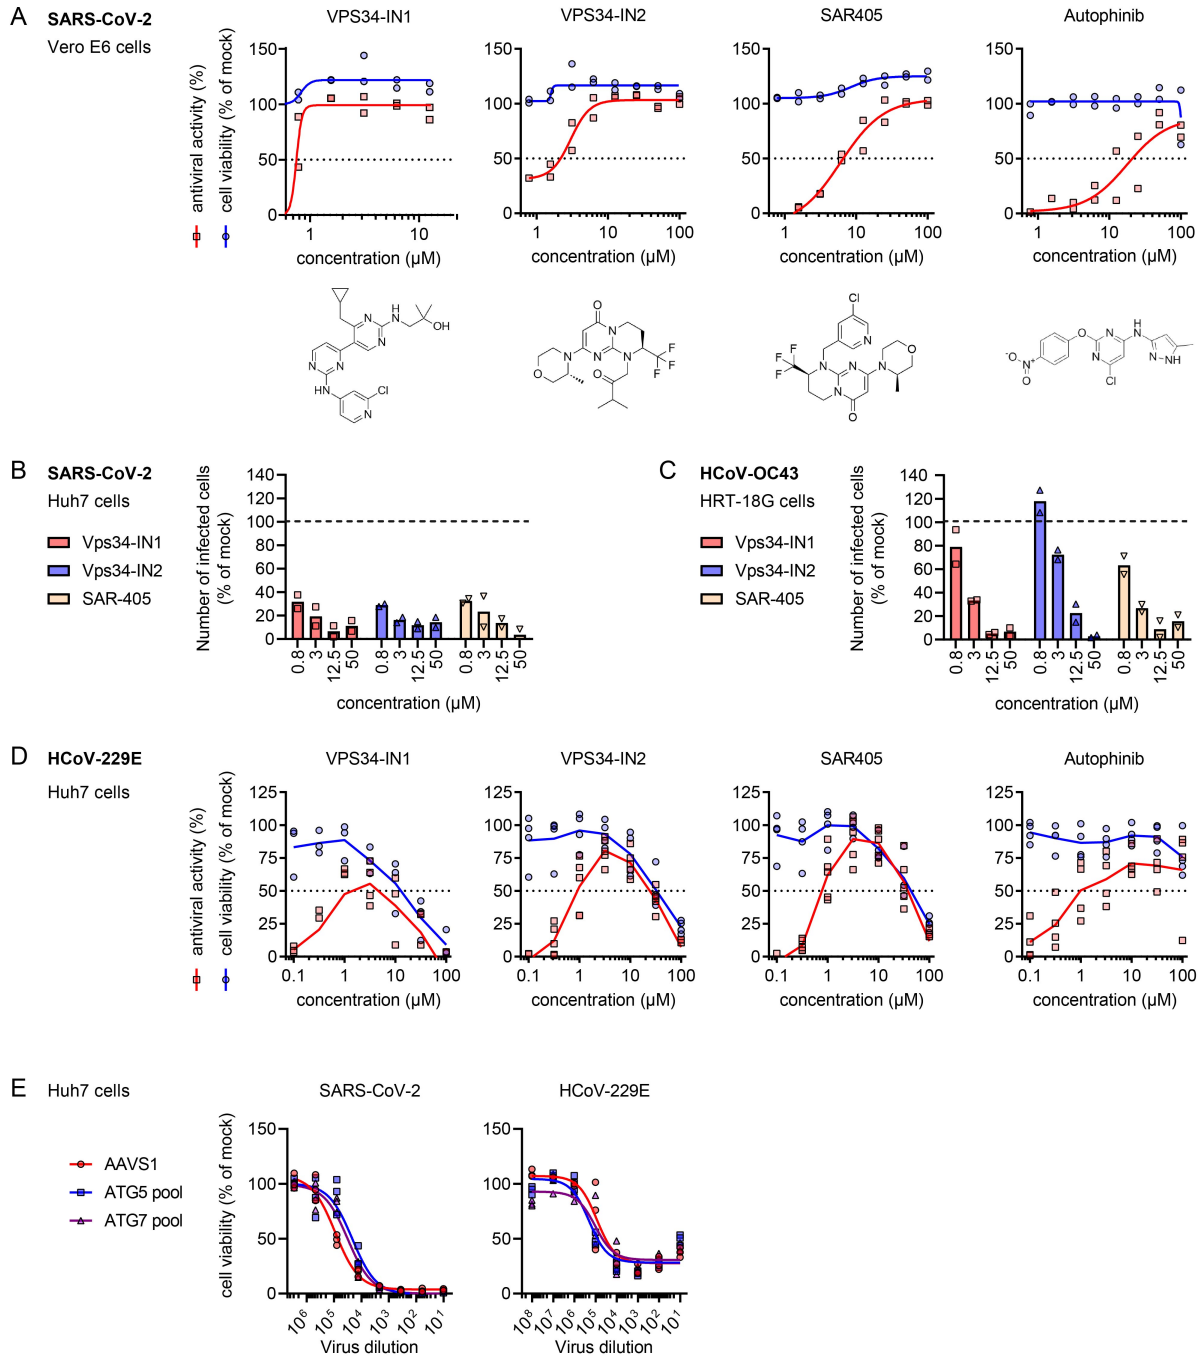

138 **Figure 2.** PI3K type 3 is a druggable target against SARS-CoV-2 and other coronaviruses. A) Vero E6 cells  
 139 constitutively expressing EGFP were pretreated for 1 day with the indicated compounds and infected with SARS-  
 140 CoV-2. Four days post infection, viability of cells was determined by measuring EGFP signal (scoring for  
 141 surviving cells following infection) or by MTS assay (scoring for cell viability/general compound toxicity in  
 142 uninfected control cells). Antiviral activities were calculated by subtracting the background (signal from infected  
 143 untreated controls) and normalizing to uninfected untreated controls **B-C**) Number of infected cells after treatment  
 144 with 12,5 μM of specific PI3K type 3 inhibitor for 6 hours, as compared to untreated control cells. The number of

145 infected cells was quantified by high content image analysis after immunofluorescence staining for dsRNA. (B)  
146 Huh7 cells infected with SARS-CoV-2 (C) HRT-18G cells infected with HCoV-OC43. (D) Huh7 cells were  
147 pretreated for 30 min with the indicated compounds and infected with HCoV-229E. At 3 days post infection, the  
148 cell viability was measured by MTS assay and plotted as a percentage of mock treated uninfected cells. (E) Huh7  
149 cells expressing pools of 4 sgRNAs targeting *ATG5*, *ATG7*, or the *AAVSI* safe targeting locus were infected with  
150 a dilution series of SARS-CoV-2 or HCoV-229E and incubated for three days at 35 °C, followed by measurement  
151 of the cell viability by MTS assay.

152

### 153 **Validation of TMEM106B, TMEM41B and EXT1 as SARS-CoV-2 or HCoV-229E host factors**

154 To validate the findings from our genetic screens, we individually expressed sgRNAs targeting the  
155 identified genes, as well as the known receptor genes *ANPEP* and *ACE2*, in Huh7 cells and tested  
156 whether their ablation affected the sensitivity of cells to CPE induced by HCoV-229E or SARS-CoV-  
157 2. sgRNAs targeting *ANPEP* protected cells from HCoV-229E-induced cell death, as determined by  
158 crystal violet staining of surviving cells (**Figure 3A**). Cells were only partially protected from SARS-  
159 CoV-2-induced CPE by sgRNAs targeting *ACE2*, which is in line with the absence of *ACE2* in our  
160 screens. This limited effect of *ACE2* sgRNAs is probably due to the very low *ACE2* expression in the  
161 human cell lines used, in contrast to human cell lines engineered to overexpress *ACE2* or Vero E6 cells  
162 (**Figure S1**), in which others have found that SARS-CoV-2 infection depends on *ACE2* (Wei et al.,  
163 2020).

164 *TMEM106B* sgRNAs were highly enriched in our high stringency SARS-CoV-2 screen. This gene  
165 encodes the yet poorly understood protein TMEM106B, which is involved in lysosomal function and  
166 implicated in neurodegenerative disorders (Nicholson and Rademakers, 2016). sgRNAs targeting  
167 *TMEM106B* protected Huh7 cells from CPE caused by SARS-CoV-2, even when exposed to high virus  
168 concentrations, but had no effect on cells infected with HCoV-229E (**Figures 3A and B**). In contrast,  
169 sgRNAs targeting *TMEM41B*, which is involved in the early stage of autophagosome formation (Morita  
170 et al., 2018), only prevented CPE induced by HCoV-229E, but had no effect on SARS-CoV-2-infected  
171 cells in this assay (**Figure 3B**). This observation, and the fact that *TMEM41B* was identified only in the



172 low stringency, but not the high stringency SARS-CoV-2 screen (**Figure 1C and D**), suggests that  
 173 SARS-CoV-2 only very weakly depends on *TMEM41B*.

174 Since *ACE2* was not identified in our screen, we questioned whether SARS-CoV-2 infection might be  
 175 supported by other genes known to be involved in virus entry that were enriched in the SARS-CoV-2  
 176 low stringency screen; *ITGB6* and *EXT1* (**Figure 1B**). Both in wildtype Huh7 cells (**Figure S3**) and  
 177 cells expressing *ACE2* sgRNAs, cells were protected against SARS-CoV-2 by sgRNAs targeting *EXT1*,  
 178 which encodes exostosin-1 and is required for the synthesis of heparan sulfate. This observation is in  
 179 line with a recent report showing that SARS-CoV-2 infection can be mediated by heparan sulfate  
 180 (Clausen et al., 2020). Taken together, these results point towards a role of heparan sulfate in SARS-  
 181 CoV-2 infection and identify *TMEM41B* and *TMEM106B* as specific host factors for HCoV-229E or  
 182 SARS-CoV-2 infection, respectively.

183

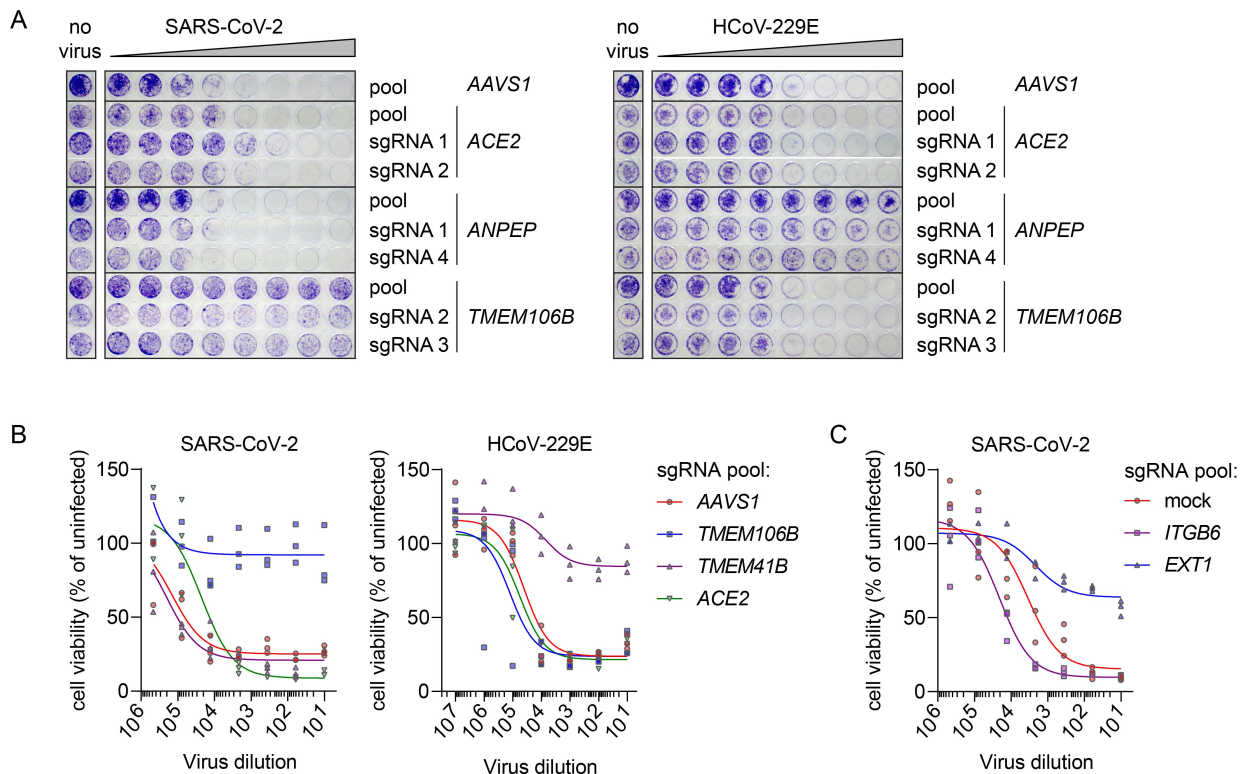

184

185 **Figure 3.** Validation of *TMEM106B* and *EXT1* as SARS-CoV-2 host factors and *TMEM41B* as a HCoV-229E  
 186 host factor. **A**) Huh7 cells expressing control sgRNAs (targeting the safe harbour gene *AAVS1*), a gene-specific  
 187 pool of 4 sgRNAs, or individual sgRNAs, were infected with a dilution series of SARS-CoV-2 (6-fold dilutions)  
 188 or HCoV-229E (10-fold dilutions) and incubated for three days at 35 °C, followed by fixation and staining of

189 surviving cells with crystal violet. **B)** Huh7 cells expressing the indicated sgRNA pools were infected with a  
190 dilution series of SARS-CoV-2 or HCoV-229E and incubated for three days at 35 °C, followed by measurement  
191 of cell viability by MTS assay. **C)** Huh7 cells expressing the indicated sgRNA pools were infected with a dilution  
192 series of SARS-CoV-2 and incubated for three days at 35 °C, followed by measurement of cell viability by MTS  
193 assay.

194

## 195 **TMEM106B is required for SARS-CoV-2 infection in multiple human cell types**

196 Our high stringency SARS-CoV-2 screen identified an important role of TMEM106B, a lysosomal  
197 protein that has never been implicated as a host factor for any pathogen before. To further corroborate  
198 the importance of TMEM106B for SARS-CoV-2 infection, we investigated its role in cell lines other  
199 than liver-derived Huh7 cells, including lung derived cell lines. Therefore, we examined several cell  
200 lines for susceptibility to SARS-CoV-2-induced CPE and selected the liver-derived cell lines Hep3B  
201 and lung-derived cell lines A549, NCI-H1975, and NCI-H2110. We next expressed *TMEM106B*  
202 sgRNAs in these cell lines. *TMEM106B* sgRNAs protected consistently against CPE caused by SARS-  
203 CoV-2 infection in Hep3B, A549, or NCI-H1975 cells, as determined by crystal violet staining (**Figure**  
204 **4A**). Also NCI-H2110 cells, in which SARS-CoV-2 causes only a very limited CPE, were protected  
205 against SARS-CoV-2-induced cell death by sgRNAs targeting *TMEM106B*, as determined by MTS  
206 assay (**Figure 4B**). To further confirm the role of TMEM106B in SARS-CoV-2 infection, double-  
207 stranded RNA intermediates of viral RNA replication were visualized by immunofluorescence staining  
208 in infected Hep3B cells containing *TMEM106B* sgRNAs at 6 hours post infection. *TMEM106B* sgRNAs  
209 reduced the number of SARS-CoV-2-infected Hep3B cells as compared to cells containing control  
210 sgRNAs (**Figure 4C**). In addition, we also observed a reduction in virus progeny released in supernatant  
211 of infected NCI-H1975 cells containing *TMEM106B* sgRNAs as compared to control sgRNAs at 2 days  
212 post infection (**Figure 4D**). To investigate whether *TMEM106B* is present in relevant cell types in the  
213 human airways, we analyzed single cell sequencing data from COVID-19 patients (Chua et al., 2020).  
214 This showed that *TMEM106B* is expressed in ciliated and secretory cells, which are the main SARS-  
215 CoV-2 susceptible airway cell types (Chua et al., 2020; Zhu et al.). Together, these results indicate that  
216 TMEM106B is required for productive infection of human cell lines of different origins with SARS-  
217 CoV-2, and is expressed in relevant cell types in the human airways.

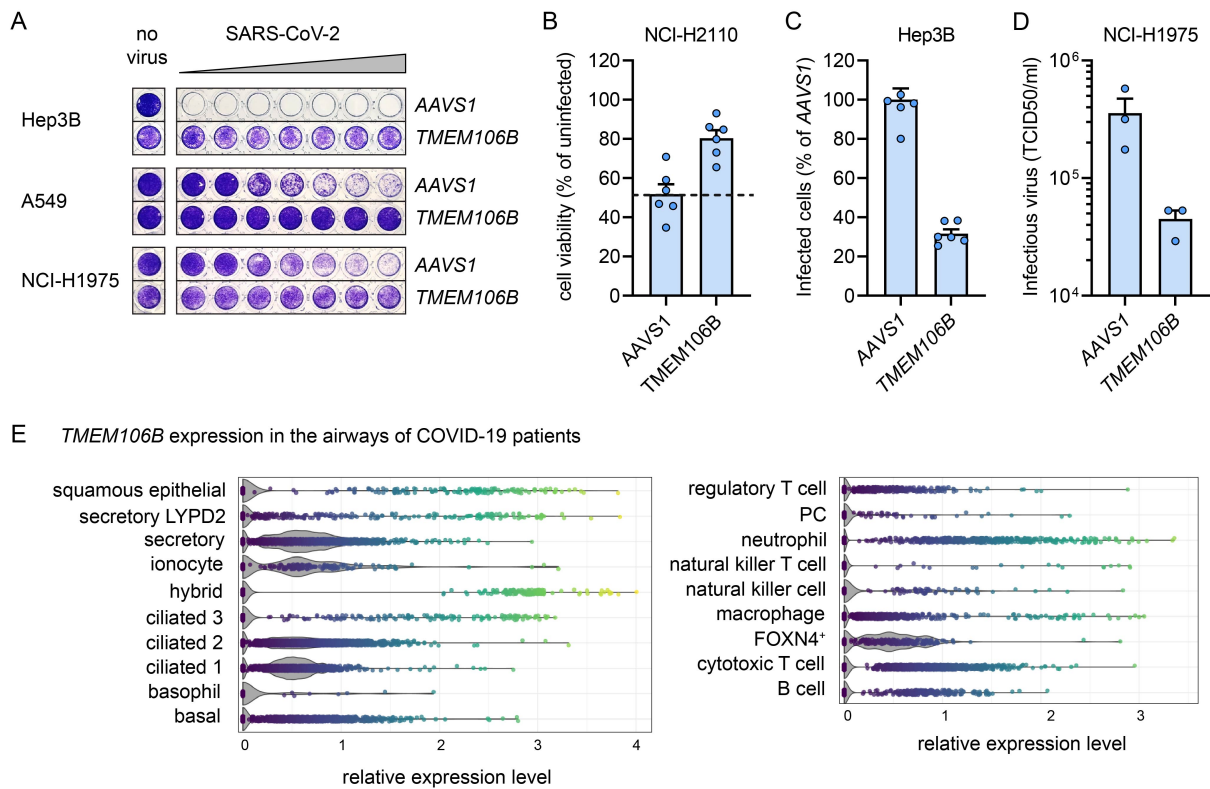

218

219 **Figure 4.** *TMEM106B* is required for SARS-CoV-2 infection in multiple human cell types and is expressed in  
220 human airways. **A**) Huh7 cells expressing control sgRNAs (targeting the safe harbour gene *AAVS1*) or a pool of 4  
221 sgRNAs targeting *TMEM106B* were infected with 6-fold dilutions of SARS-CoV-2 and incubated 3 days (Hep3B)  
222 or 8 days (A549) at 35 °C or 6 days at 37 °C (NCI-H1975), followed by fixation and staining of intact cells with  
223 crystal violet. **B**) NCI-H2110 cells expressing pools of 4 sgRNAs were infected with SARS-CoV-2 at a MOI of  
224 ~0.2 and incubated for 7 days at 37 °C, followed by measurement of the cell viability by MTS assay. Triplicate  
225 data from two independent experiments are shown. **C**) Hep3B cells expressing pools of 4 sgRNAs were infected  
226 with a MOI of ~40 and stained for dsRNA at 6 hours post infection. The percentage of infected cells was  
227 determined by high content image analysis. Triplicate data from two independent experiments are shown. **D**) NCI-  
228 H1975 cells expressing pools of 4 sgRNAs were infected with SARS-CoV-2 at a MOI of ~1.5 and incubated for  
229 2 days at 37 °C, after which the amount of infectious virus in the supernatant was determined by end-point-dilution  
230 on Vero E6 cells. Bars indicate the mean ±SEM. **E**) Analysis of single-cell sequencing data from two COVID-19  
231 patients (Chua et al., 2020). Violin plots of *TMEM106B* expression levels are shown for single cells combined  
232 from nasopharyngeal swabs, bronchiolar protected specimen brushes, and bronchoalveolar lavages. Images were  
233 generated with the Magellan: COVID-19 Omics Explorer (<https://digital.bihealth.org/>).

234

## 235 DISCUSSION

236 Although the receptor interactions and proteolytic activation of the SARS-CoV-2 S protein have been  
237 extensively studied, little is known about host factors required in following steps of viral infection. Here,  
238 we performed genome-wide genetic screens with SARS-CoV-2 and HCoV-229E and identified PI3K  
239 type 3 as a host factor shared by both viruses. Moreover, we show that the regulator of autophagy

240 TMEM41B is required for HCoV-229E infection and identified TMEM106B as a new cellular host  
241 factor important for SARS-CoV-2 infection.

242 In our SARS-CoV-2 screens we did not identify *ACE2*, which is in contrast to previous screens  
243 performed in Vero E6 cells or engineered human cells overexpressing ACE2 (Heaton et al., 2020; Wei  
244 et al., 2020; Zhu et al., 2020). It has been reported that ACE2 overexpression in human cells enhances  
245 SARS-CoV-2 infection (Hoffmann et al., 2020; Zhou et al., 2020; Zhu et al., 2020) and that infection is  
246 inhibited by ACE2 depletion in Vero E6 cells (Wei et al., 2020). However, to our knowledge, it has not  
247 been investigated whether knockout of ACE2 in non-transgenic human cells prevents SARS-CoV-2  
248 infection. We observed that all human cell lines tested in this study were susceptible to SARS-CoV-2  
249 infection, despite very low levels of ACE2 expression. In addition, we found that heparan sulfate is  
250 important for efficient infection, both in wt Huh7 cells and cells expressing *ACE2* sgRNAs (**Figures 3**  
251 **and S3**), which is in line with a recent study showing that heparan sulfate facilitates SARS-CoV-2  
252 binding to cells (Clausen et al., 2020). Moreover, another recent study showed that two other human  
253 receptor proteins, KREMEN1 and ASGR1, can facilitate infection of SARS-CoV-2 S pseudotyped virus  
254 (Gu et al., 2020). Therefore, it is plausible that SARS-CoV-2, alike other viruses, has a broader repertoire  
255 of possible (redundant) cellular receptor than initially postulated.

256 PI3K type 3 inhibitors have antiviral activity against SARS-CoV-2, HCoV-229E, and HCoV-OC43, and  
257 may therefore have potential to serve as pan-coronavirus inhibitors. Our data (**Figure S2B**) suggest that  
258 PI3K type 3 plays a role in an early step of the viral life cycle, such as endocytosis, fusion, translation  
259 or early onset of replication. As recently demonstrated by others, treatment of SARS-CoV-2 infected  
260 cells with PI3K type 3 inhibitors causes dispersal of the viral N protein and dsRNA throughout the  
261 cytoplasm, suggesting a role of this factor in replication complex formation (Silvas et al., 2020). We  
262 showed that disruption of the autophagy genes *ATG5* and *ATG7*, which are required for phagophore  
263 expansion, does not negatively impact SARS-CoV-2 and HCoV-229E infection (**Figure 2E**). Thus, it is  
264 possible that PI3K type 3 supports infection by inducing phagophore nucleation, while the later stages  
265 of macroautophagy are not required.

266 Importantly, we identified a novel host factor required specifically for SARS-CoV-2 infection.  
267 TMEM106B is a 274 amino acid transmembrane protein that resides in endosomes and lysosomes, and  
268 controls lysosome size, number, mobility and trafficking. TMEM106B is not well characterized and  
269 only recently received attention because of its role in frontotemporal dementia, the second leading cause  
270 of pre-senile neurodegeneration after Alzheimer's disease (Nicholson and Rademakers, 2016).  
271 TMEM106B plays a pivotal role in lysosomal acidification, via direct interaction with the proton pump  
272 vacuolar-ATPase accessory protein 1 (AP1) (Klein et al., 2017). Therefore, a possible role of  
273 TMEM106B might be to promote acidification of vesicles in the endolysosomal pathway, in order to  
274 facilitate efficient delivery of the SARS-CoV-2 genome into the cytoplasm. This is in agreement with  
275 our finding that TMEM106B plays a role early in the viral replication cycle, i.e. within the first 6 hours  
276 after infection (**Figure 4C**) and with recent findings that entry of SARS-CoV-2 S pseudotyped virus  
277 depends on endosomal acidification (Hoffmann et al., 2020; Ou et al., 2020). Interestingly, HCoV-229E  
278 also requires endosomal acidification (Blau and Holmes, 2001), but does not require TMEM106B for  
279 infection. This suggests that different, though related, viruses may depend on distinct factors to exploit  
280 similar cellular pathways. Alternatively, TMEM106B may function as a lysosomal receptor for SARS-  
281 CoV-2, similar to the lysosomal receptor NPC1 used by Ebola virus (Carette et al., 2011). Further studies  
282 are needed to precisely establish which stage of infection is supported by TMEM106B.

283 As new pathogenic coronaviruses periodically emerge, these viruses will continue to pose a public health  
284 threat beyond the ongoing COVID-19 pandemic, warranting the development of potent coronavirus  
285 inhibitors. Here, we used a genome-wide knockout approach to identify coronavirus host factors in  
286 human cells and discovered TMEM106B as a potential new target that might be exploited in the  
287 development of drugs to counter the current pandemic or future outbreaks of pathogenic coronaviruses.

## 288 **ACKNOWLEDGEMENTS**

289 We thank Niels Willems, Nathalie van Winkel, Liesbeth Mercelis, Kristien Minner, Lotte Bral, and Bob  
290 Massant for exceptional technical help and support. S.J., J.N. and K.D. were supported by the Research  
291 Foundation Flanders (FWO) under the Excellence of Science (EOS) program (VirEOS project  
292 30981113).

293 **AUTHOR CONTRIBUTIONS**

294 J.B., S.J. and P.M. performed genetic screens. J.B., L.P., S.J. performed infectivity assays. L.P., E.V.,  
295 and M.J. performed other experiments. J.B., L.P., E.V., and M.J. were involved in data analysis. J.B.,  
296 L.P., E.V., M.J., and D.D designed the project. D.J., J.N., K.D., P.M., and D.D. supervised and supported  
297 the project. J.B., L.P., E.V., M.J., and D.D. co-wrote the manuscript.

298 **DECLARATION OF INTERESTS**

299 The authors declare no competing interests

300

301 **METHODS**

302 **Chemicals and reagents.** Reference inhibitor compounds Autophinib and VPS34-IN1 were purchased  
303 from Selleckchem and SAR405 and VPS34-IN2 were obtained from MedChemExpress. Plant lectin  
304 *Urtica dioica* agglutinin (UDA), isolated from the *Urtica dioica* rhizomes, was kindly donated by E. Van  
305 Damme (Ghent, Belgium). Chloroquine was purchased from Acros Organics and Remdesivir was  
306 ordered from MedKoo. Stock solutions were prepared in DMSO.

307 **Cell culture.** HEK293T (received from prof. Jason Moffat, Donnelly Centre, University of Toronto,  
308 Canada), Vero E6, Huh-7 (CLS - 300156; human hepatoblastoma), Hep3B (ATCC HB-8064; human  
309 hepatocellular carcinoma) and HRT-18G (ATCC CRL-11663; human colorectal adenocarcinoma) were  
310 maintained in Dulbecco's Modified Eagle Medium (DMEM, Gibco Life Technologies) supplemented  
311 with 8% heat-inactivated fetal bovine serum (HyClone, GE Healthcare Life Sciences), 0.075% sodium  
312 bicarbonate (Gibco Life Technologies) and 1mM sodium pyruvate (Gibco Life Technologies). A549  
313 cells were maintained in F-12K medium supplemented with 10% heat-inactivated fetal bovine serum.  
314 NCI-H1975 (ATCC-CRL-5908) and NCI-H2110 (ATCC-CRL-5924) cells were maintained in RPMI  
315 medium supplemented with 10% heat-inactivated fetal bovine serum. All cell lines were maintained at  
316 37°C under 5% CO<sub>2</sub>.

317 **Generation of virus stocks.** SARS-CoV-2 strain BetaCov/Belgium/GHB-03021/2020 (EPI ISL  
318 407976|2020-02-03) was recovered from a nasopharyngeal swab taken from a RT-qPCR-confirmed

319 asymptomatic patient returning from Wuhan in February 2020. Infectious virus was isolated and  
320 multiplied by five serial passages on Huh7 cells. Cells were seeded in DMEM supplemented with 10%  
321 heat-inactivated fetal bovine serum to reach a confluency of ~80% the next day. After replacing the  
322 medium by DMEM + 2% or 4% fetal bovine serum, cells were infected with SARS-CoV-2 at a MOI of  
323 ~0.01. When most cells were dying, supernatant was removed from the cells, centrifuged to remove cell  
324 debris and stored at -80 °C. The HCoV-229E (ATCC VR-740) and HCoV-OC43 (ATCC VR-1558)  
325 virus stocks were obtained by inoculating a confluent monolayer of Huh7 or HRT-18G cells,  
326 respectively. The supernatant was harvested after 3 days of incubation for HCoV-229E, or 7 days of  
327 incubation for HCoV-OC43, at 35 °C under 5% CO<sub>2</sub> and stored in aliquots at -80°C, after one freeze-  
328 thaw cycle and removal of cellular debris by centrifugation.

329 **Genome-wide knockout screens.** For the HCoV-229E and SARS-CoV-2 (high stringency) screens, 1.5  
330 x 10<sup>8</sup> Huh7 cells for each of two replicates were transduced at a MOI of ~0.3 with lentivirus containing  
331 the Brunello genome-wide library in lentiCRISPRv2 (Addgene 73179), which contains 77,441 sgRNAs  
332 targeting 19,114 genes. Cells were selected with 2 µg/ml puromycin for three days to eliminate  
333 untransduced cells, seeded at a coverage of ~200 cells/sgRNA for each replicate and infected with  
334 HCoV-229E or SARS-CoV-2. Surviving cells were harvested at 18 days post infection (HCoV-229E)  
335 or 41 days post infection (SARS-CoV-2). For the SARS-CoV-2 low stringency screen, 1.5 x 10<sup>8</sup> Huh7  
336 cells for each of two replicates were transduced at a MOI of ~0.2 with lentivirus containing the Brunello  
337 library and selected with puromycin for three days. Then, cells were seeded at a coverage of 500  
338 cells/sgRNA for each replicate in DMEM with 4% fetal bovine serum and infected with SARS-CoV-2  
339 at a MOI of 0.1. For each replicate, uninfected cells were maintained under similar conditions as the  
340 infected cells and harvested simultaneously. Five days post infection, cells were cultivated in DMEM  
341 with 20% fetal bovine serum for three days to allow cell recovery, and were infected again with a MOI  
342 of ~0.1. Cells were harvested at 14 days post infection. Genomic DNA was extracted from cells using  
343 the QIAmp DNA Mini Kit (Qiagen ref. 51306) or, for the SARS-CoV-2 low stringency screen with the  
344 QIAmp DNA Blood maxi kit (Qiagen ref. 51194). In a first PCR step, regions of ~600 bp containing  
345 the sgRNA sequence were amplified using NEBNext Ultra II Q5 Master Mix (NEB #M0544S) in 25

346 amplification cycles. A second PCR of 10 cycles with NEBNext Ultra II Q5 Master Mix was performed  
347 with primers containing Illumina adapters and TruSeq indexes. Products were separated by agarose gel  
348 electrophoresis and purified with the PureLink Quick Gel Extraction Kit (Thermo Fisher K210012).  
349 Samples were then diluted to 2–4 nM, pooled, and denatured and diluted according to the instructions  
350 for single-end sequencing on a MiSeq (Illumina) with a MiSeq-v2 50 cycles or a MiSeq-v3-150 cycles  
351 kit (Illumina) and 10% PhiX (Illumina) spike-in. FastQ files were further analyzed with CRISPRcloud2  
352 (Jeong et al., 2018).

353 **Genome-wide knockout screen hit validation via cell viability assays.** For individual validation of  
354 genes, guides enriched during the genome-wide knockout screens were cloned into the pLentiCRISPRv2  
355 plasmid (Addgene 52961) following the standard cloning protocol. For lentiviral particle production,  
356 HEK293T cells were plated in 40 mL supplemented DMEM in T150 (TPP) flasks at 45% confluency  
357 and incubated overnight. 24 hours later, the cells were transfected using X-TremeGENE 9 (Roche) with  
358 the pLentiCRISPR plasmids and the lentiviral packaging plasmids pMD2.G and psPAX2 to generate  
359 lentiviral particles coated with the VSV-G protein and incubated overnight. 24 hours post transfection  
360 the medium was changed to DMEM supplemented with serum-free BSA growth media (DMEM +  
361 1.1g/100mL BSA and 20 µg/mL gentamicin). The supernatant containing lentiviral particles was  
362 harvested 72 hours after transfection and stored at -80 °C. Cells were transduced with lentiviruses  
363 expressing only one sgRNA or a pool of the 4 sgRNAs from the Brunello genome-wide knockout library  
364 and then selected with puromycin for 3 days (sgRNAs target sequences are in **Table S1**). Cells stably  
365 expressing specific sgRNAs were seeded in 96-well plates at 4000 cells/well in medium with 8% or  
366 10% fetal bovine serum. The following day, serial dilutions of virus in medium without fetal bovine  
367 serum were added to the cells, resulting in a serum concentration of 4% or 5%. Cells were incubated  
368 until sufficient CPE was visible. For MTS assays, medium was removed from the cells and replaced by  
369 MTS reagent (CellTiter 96 AQueous One Solution Cell Proliferation Assay from Promega, Madison,  
370 WI) diluted in PBS. The absorbance was measured with a Tecan Spark microplate reader. For crystal  
371 violet staining, cells were fixed in 4% formaldehyde for 30 min, stained with a 1% crystal violet solution  
372 in water, and rinsed with water.



373 **Virus inhibition assays.** The antiviral activity of PI3K type 3 inhibitors on SARS-CoV-2 in Vero E6  
374 cells was evaluated as follows: on day -1, the test compounds were serially diluted in DMEM (Gibco  
375 cat no 41965-039) supplemented with 2% v/v heat-inactivated FCS and sodium bicarbonate (Gibco  
376 25080-060). Diluted compounds were then mixed with EGFP-expressing Vero E6 cells at 25,000  
377 cells/well in 96-well plates (Greiner Bio-One, Vilvoorde, Belgium; Catalog 655090). The plates were  
378 incubated overnight in a humidified incubator at 37°C and 5% CO<sub>2</sub>. On day 0, SARS-CoV-2 was added  
379 at 20 TCID<sub>50</sub>/well and on day 4 post infection, the wells were examined for EGFP expression using a  
380 high-content imaging platform and the images of the wells were converted into signal values. To obtain  
381 values for antiviral activity, the background signal was subtracted based on infected-untreated controls  
382 and signal values were normalized to uninfected-untreated controls. Toxicity of compounds in the  
383 absence of virus was evaluated by MTS assay. All compounds were tested in duplicate, in two  
384 independent experiments. To evaluate the antiviral activity of PI3K type 3 inhibitors against HCoV-  
385 229E, Huh7 cells were seeded into 384-well plates. The next day, serial dilutions of the compounds  
386 were added to the cells prior to infection with HCoV-229E at 30 TCID<sub>50</sub> (50% tissue culture infective  
387 doses) per well. At 3 days post infection, the virus-induced CPE was measured by MTS assay. The  
388 compounds were tested in at least four independent experiments.

389 **Time of drug addition assay.** Huh-7 cells were seeded into 48-well dishes at 40,000 cells per well.  
390 After 24 hours of incubation at 37°C, the cells were cooled on ice for 1 hour, followed by addition of 30  
391 CCID<sub>50</sub> of the HCoV-229E virus and further incubation at 35°C. The test compounds were added at a  
392 concentration approximately 10-fold above their EC<sub>50</sub>, at different time points post infection (-30 min,  
393 0h, 30 min, 1h, 2h, 3h, 5h and 8h p.i.). At 11 h p.i., total cellular RNA extracts were prepared and viral  
394 RNA was quantified using the CellsDirect One-Step qRT-PCR kit (Thermo Fisher Scientific). One-step  
395 real-time RT-PCR was performed using the 229E-FP forward primer (5'-  
396 TTCCGACGTGCTCGAACTTT-3'), 229E-RP reverse primer (5'-  
397 CCAACACGGTTGTGACAGTGA-3') and the TaqMan minor groove binder (MGB) probe 229E-TP  
398 (FAM-5'-TCCTGAGGTCAATGCA-3'-NFQ-MGB; Thermo Fisher Scientific), derived from the  
399 HCoV 229E membrane protein gene sequence as described previously (Vijgen et al., 2005).

400 Amplification and detection were performed in an ABI 7500 Fast Sequence Detection System (Applied  
401 Biosystems, Foster City, CA, USA) under the following conditions: an initial reverse transcription at  
402 50 °C for 15 min, followed by PCR activation at 95 °C for 2 min and 45 cycles of amplification (15 s at  
403 95 °C and 30 s at 60 °C). Six independent experiments were carried out.

404 **Immunofluorescence assays.** Immunofluorescence staining was performed according to standard  
405 procedures. Briefly, all cells were seeded at a density of 20.000 cells per well in 8-well  $\mu$ -slides (Ibidi).  
406 Cells were allowed to adhere overnight before receiving compound treatment and/or viral infection with  
407 SARS-CoV-2 or HCoV-OC43. After incubation, cells were fixed (4% PFA in PBS), washed and  
408 permeabilized (0.2% Triton X-100 in PBS). Employed primary antibodies were rabbit anti-LC3B  
409 (L7543, Sigma) at a 1:200 dilution and mouse anti-dsRNA (J2, Scicons) at a 1:1000 dilution. Secondary  
410 antibodies Alexa Fluor® 568 goat anti-rabbit (A11011, Invitrogen, ThermoFisher Scientific) and Alexa  
411 Fluor® 488 goat anti-mouse (A11029, Invitrogen, ThermoFisher Scientific) were diluted 1:500. Cell  
412 nuclei were counterstained with DAPI and the samples were imaged by confocal microscopy on a Leica  
413 TCS SP5 confocal microscope (Leica Microsystems), employing a HCX PL APO 63x (NA 1.2) water  
414 immersion objective. The percentage of infected cells was quantified by high content image analysis  
415 (ArrayScan XTI, ThermoFisher Scientific) for at least 3000 cells per condition.

416 **Generation of ACE2 overexpressing Huh7 cells.** The pLCKO plasmid was a gift from Jason Moffat  
417 (Addgene plasmid #73311). The invariant gRNA scaffold was removed together with the puromycin  
418 resistance gene and replaced with *ACE2* (Addgene Plasmid #1786) followed by a P2A-coupled  
419 blasticidin resistance gene driven by a cytomegalovirus promotor. The resulting pLCKO-ACE2-P2A-  
420 Blasticidin vector was used to make lentiviral particles, as described above. Huh7 cells were transduced  
421 with a the lentiviral stock in the presence of polybrene (8  $\mu$ g/ml). After 24 hours medium was replaced  
422 with medium containing Blasticidin (10  $\mu$ g/ml) and cells were incubated for an additional 48 hours.

423 **Simple Western analysis.** For Simple Western analysis, cells were lysed in RIPA lysis buffer (Sigma)  
424 for 1 hour at 4 °C. Whole cell lysates were cleared by centrifugation. Proteins were separated by size  
425 (12-230 kDa) and visualized on a Wes system (ProteinSimple, San Jose, CA, USA) with an anti-mouse  
426 or anti-goat IgG-HRP antibody (R&D systems, HAF109) detecting the primary antibody against

427 GAPDH (Santa Cruz Biotechnology, sc-47724) or anti-hACE2 (R&D systems, AF933), respectively.

428 Protein signals were visualized and quantified with the Compass software, v4.0.0 (Protein Simple).

429

430 **SUPPLEMENTAL INFORMATION**

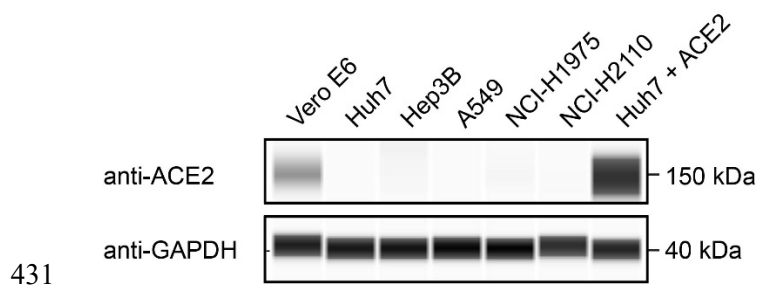

432 **Figure S1.** Analysis of ACE2 expression levels in different cell lines. Lysates of the indicated wildtype  
433 cell lines, or Huh7 cells transduced with an *ACE2* overexpression construct, were analyzed with a  
434 ProteinSimple Wes™ system, using antibodies specific for ACE2 and the endogenous control GAPDH.

435

436

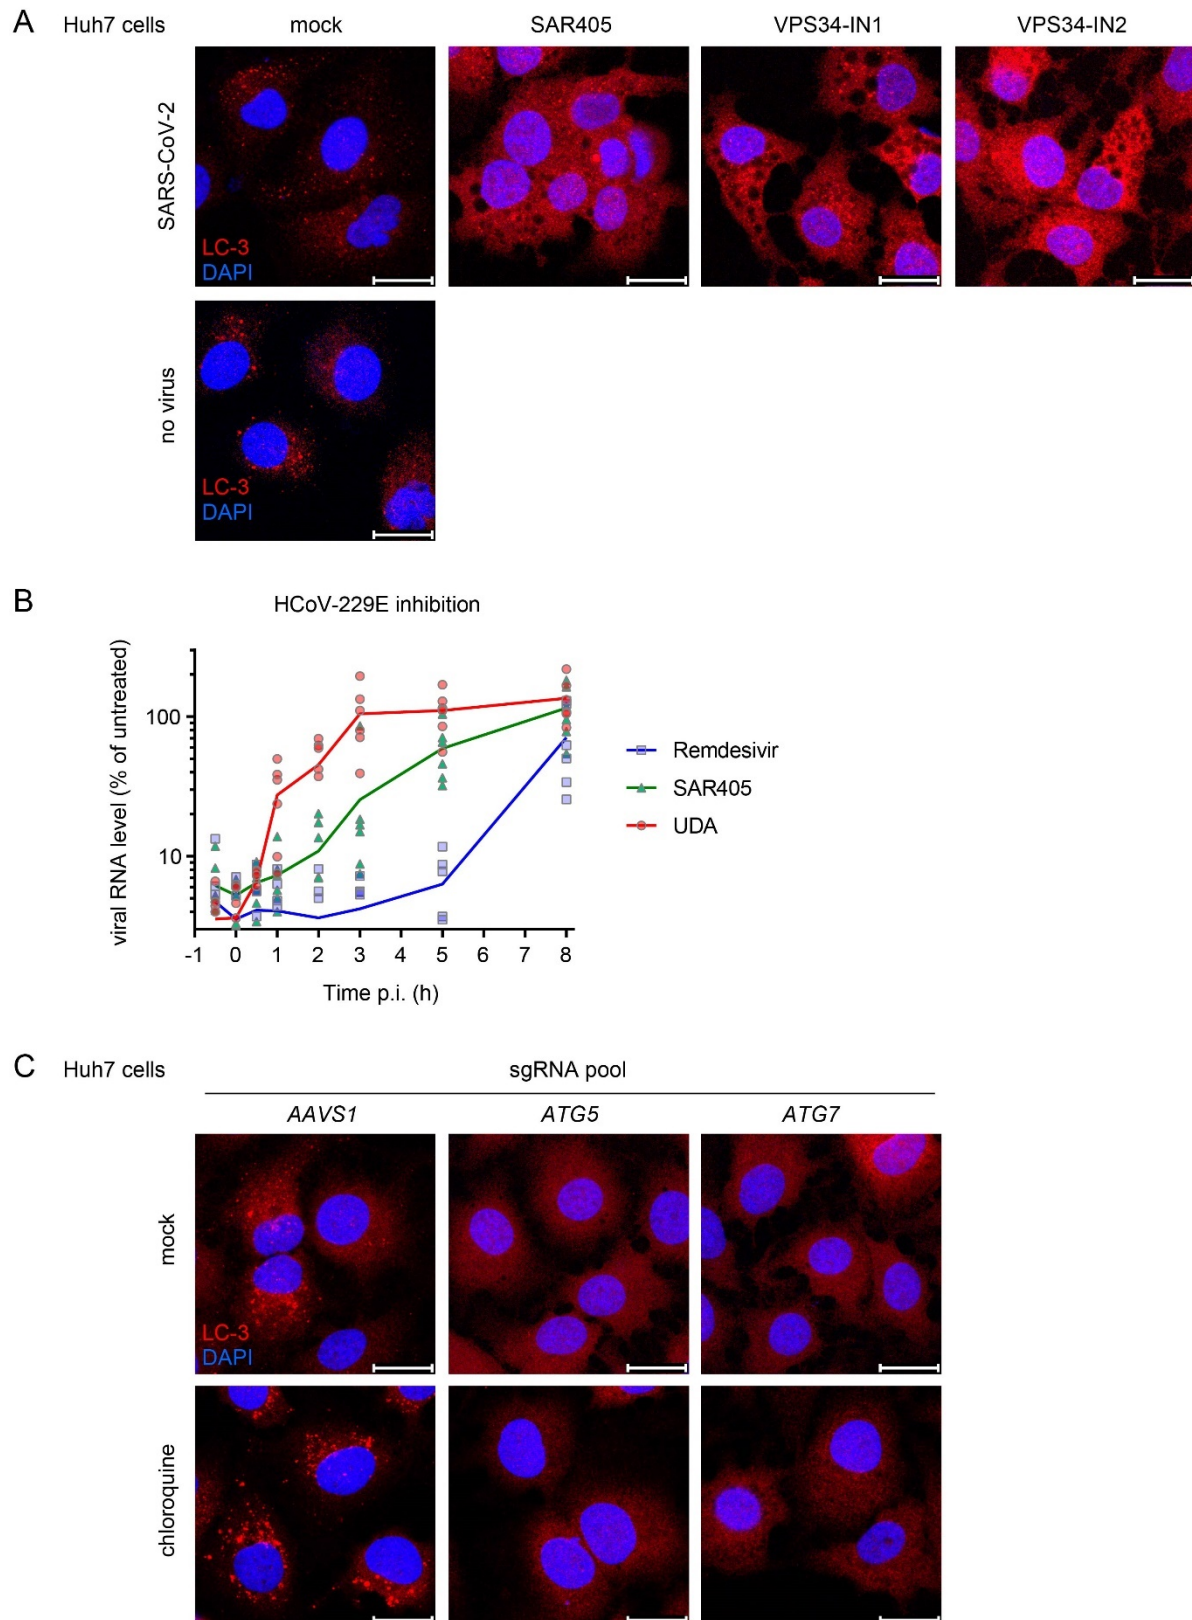

437

438 **Figure S2.** Coronavirus infection requires PI3K type 3 in an early step of the life cycle and does not

439 require a functional macroautophagy pathway. **A)** Immunofluorescence staining of LC3B in uninfected

440 or SARS-CoV-2-infected Huh7 cells treated with 12.5  $\mu$ M of specific PI3K type 3 inhibitors for 6 hours;  
441 PI3K type 3 inhibition completely abolishes the formation of LC3-positive puncta and induces vacuoles  
442 in treated cells. **B)** Time series experiment showing early stage post-receptor binding effect of PI3K  
443 type 3 inhibitor SAR405 on HCoV-229E infection. Huh7 cells were infected, treated with SAR405 at  
444 different timepoints, followed by determination of viral RNA levels at 10 hours post infection by qPCR.  
445 UDA: *Urtica dioica* agglutinin. Combined results of six independent experiments are shown **C)**  
446 Immunofluorescence staining of LC3B in Huh7 cells expressing a pool of four sgRNAs targeting *ATG5*,  
447 *ATG7*, or the *AAVS1* safe targeting locus. Chloroquine, an inhibitor of autophagic flux that decreases  
448 autophagosome-lysosome fusion, induces an increase in LC3-positive puncta in control cells, but fails  
449 to do so in *ATG5* and *ATG7* knockout cells, confirming the effective knockout of both genes (bar: 25  
450  $\mu$ m).

451

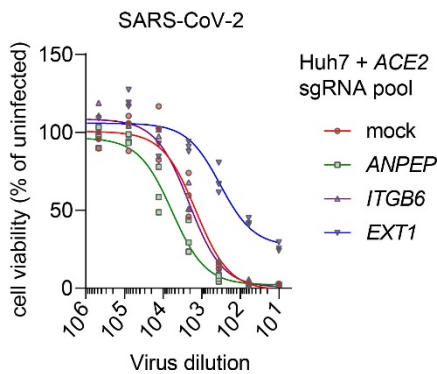

452

453 **Figure S3.** SARS-CoV-2 infection requires the heparan sulfate biosynthesis factor *EXT1*. Huh7 cells  
454 expressing a pool of sgRNAs targeting *ACE2*, together with the indicated sgRNA pools were infected  
455 with a dilution series of SARS-CoV-2 and incubated for three days at 35 °C, followed by measurement  
456 of cell viability by MTS assay.

457

458

459

460 **Table S1** Sequences of sgRNAs used in this study

| Gene_ID  | sgRNA_ID        | sgRNA sequence        |
|----------|-----------------|-----------------------|
| ATG5     | ATG5 sgRNA1     | AAGAGTAAGTTATTTGACGT  |
| ATG5     | ATG5 sgRNA2     | CCTTAGATGGACAGTGCAGA  |
| ATG5     | ATG5 sgRNA3     | TGATATAGCGTGAAACAAGT  |
| ATG5     | ATG5 sgRNA4     | GATCACAAGCAACTCTGGAT  |
| ATG7     | ATG7 sgRNA1     | CCAGAAAATATTCCCCGGTG  |
| ATG7     | ATG7 sgRNA2     | TCCTACTTTAGACTTGACACA |
| ATG7     | ATG7 sgRNA3     | CTTGAAAGACTCGAGTGTGT  |
| ATG7     | ATG7 sgRNA4     | CTCTTGTAATAACCATCTGT  |
| ACE2     | ACE2 sgRNA1     | CCAAAGGCGAGAGATAGTTG  |
| ACE2     | ACE2 sgRNA2     | CAGGATCCTTATGTGCACAA  |
| ACE2     | ACE2 sgRNA3     | TGCACAGAGAATATTCAAGG  |
| ACE2     | ACE2 sgRNA4     | AACATCTTCATGCCTATGTG  |
| ANPEP    | ANPEP sgRNA1    | CGTTCAGGGCATAATCGCCG  |
| ANPEP    | ANPEP sgRNA2    | TCACGGTGGATACCAGCACG  |
| ANPEP    | ANPEP sgRNA3    | CATCACGCTTATCCACCCCA  |
| ANPEP    | ANPEP sgRNA4    | CCTTGGACCAAAGTAAAGCG  |
| TMEM106B | TMEM106B sgRNA1 | TATTCACGTCGATAGAGCG   |
| TMEM106B | TMEM106B sgRNA2 | GGAACAGGAAGAATTCCTAG  |
| TMEM106B | TMEM106B sgRNA3 | GAGTCACATCTGAAAACATG  |
| TMEM106B | TMEM106B sgRNA4 | TTCAAAAACAGTTATTGGAA  |
| TMEM41B  | TMEM41B sgRNA1  | TATACTTACTCACTAAGCTG  |
| TMEM41B  | TMEM41B sgRNA2  | GCTCACACACGACCCCCGT   |
| TMEM41B  | TMEM41B sgRNA3  | AGCAGTAAAATGGTCACAGC  |
| TMEM41B  | TMEM41B sgRNA4  | AGGCACCAAGTCCAGAACAC  |
| ITGB6    | ITGB6 sgRNA1    | TGAGCACACCAGGCACACTG  |
| ITGB6    | ITGB6 sgRNA2    | GCTAATATTGACACACCCGA  |
| ITGB6    | ITGB6 sgRNA3    | ACACACCAAGACAGTTGACA  |
| ITGB6    | ITGB6 sgRNA4    | CCAGACTGAGGACTACCCGG  |
| EXT1     | EXT1 sgRNA1     | ATATCACGTCCATAACGGGG  |
| EXT1     | EXT1 sgRNA2     | GATTGTATTA ACTACTAG   |
| EXT1     | EXT1 sgRNA3     | GGATGATCCTTAGAAAAGAG  |
| EXT1     | EXT1 sgRNA4     | AAGTTACCAAACATTCTAG   |
| AAVS1    | AAVS1 sgRNA1    | GTCACCAATCCTGTCCCTAG  |
| AAVS2    | AAVS1 sgRNA2    | CAGTTAAAGCGACTCCAATG  |
| AAVS3    | AAVS1 sgRNA3    | AAGCGGCTCCAATTCGGAAG  |
| AAVS4    | AAVS1 sgRNA4    | TGCTTGGCAAACACTACTCTT |

461

462 **REFERENCES**

- 463 Backer, J.M. (2016). The intricate regulation and complex functions of the Class III phosphoinositide  
464 3-kinase Vps34. *Biochem. J.* 473, 2251–2271.
- 465 Bago, R., Malik, N., Munson, M.J., Prescott, A.R., Davies, P., Sommer, E., Shpiro, N., Ward, R.,  
466 Cross, D., Ganley, I.G., et al. (2014). Characterization of VPS34-IN1, a selective inhibitor of Vps34,  
467 reveals that the phosphatidylinositol 3-phosphate-binding SGK3 protein kinase is a downstream target  
468 of class III phosphoinositide 3-kinase. *Biochem. J.* 463, 413–427.
- 469 Beigel, J.H., Tomashek, K.M., Dodd, L.E., Mehta, A.K., Zingman, B.S., Kalil, A.C., Hohmann, E.,  
470 Chu, H.Y., Luetkemeyer, A., Kline, S., et al. (2020). Remdesivir for the Treatment of Covid-19 —  
471 Preliminary Report. *N. Engl. J. Med.*
- 472 Blau, D.M., and Holmes, K. V (2001). Human coronavirus HCoV-229E enters susceptible cells via  
473 the endocytic pathway. *Adv. Exp. Med. Biol.* 494, 193–198.
- 474 Carette, J.E., Raaben, M., Wong, A.C., Herbert, A.S., Obernosterer, G., Mulherkar, N., Kuehne, A.I.,  
475 Kranzusch, P.J., Griffin, A.M., Ruthel, G., et al. (2011). Ebola virus entry requires the cholesterol  
476 transporter Niemann-Pick C1. *Nature* 477, 340–343.
- 477 Chan, J.F., To, K.K., Tse, H., Jin, D.Y., and Yuen, K.Y. (2013). Interspecies Transmission and  
478 Emergence of Novel Viruses: Lessons From Bats and Birds. *Trends Microbiol.* 21.
- 479 Chua, R.L., Lukassen, S., Trump, S., Hennig, B.P., Wendisch, D., Pott, F., Debnath, O., Thürmann, L.,  
480 Kurth, F., Völker, M.T., et al. (2020). COVID-19 severity correlates with airway epithelium–immune  
481 cell interactions identified by single-cell analysis. *Nat. Biotechnol.* 38.
- 482 Clausen, T.M., Sandoval, D.R., Spliid, C.B., Pihl, J., Painter, C.D., Thacker, B.E., Glass, C.A.,  
483 Narayanan, A., Majowicz, S.A., Zhang, Y., et al. (2020). SARS-CoV-2 Infection Depends on Cellular  
484 Heparan Sulfate and ACE2. *Cell* 183.
- 485 Cui, J., Li, F., and Shi, Z.L. (2019). Origin and evolution of pathogenic coronaviruses. *Nat. Rev.*  
486 *Microbiol.* 17, 181–192.



- 487 Dikic, I., and Elazar, Z. (2018). Mechanism and medical implications of mammalian autophagy. *Nat.*  
488 *Rev. Mol. Cell Biol.* *19*, 349–364.
- 489 Doench, J.G., Fusi, N., Sullender, M., Hegde, M., Vaimberg, E.W., Donovan, K.F., Smith, I., Tothova,  
490 Z., Wilen, C., Orchard, R., et al. (2016). Optimized sgRNA design to maximize activity and minimize  
491 off-target effects of CRISPR-Cas9. *Nat. Biotechnol.* *34*, 184–191.
- 492 Dong, E., Du, H., and Gardner, L. (2020). An Interactive Web-Based Dashboard to Track COVID-19  
493 in Real Time. *Lancet. Infect. Dis.* *20*.
- 494 Fehr, A.R., and Perlman, S. (2015). Coronaviruses: An Overview of Their Replication and  
495 Pathogenesis. In *Coronaviruses: Methods and Protocols*, pp. 1–282.
- 496 Flint, M., Chatterjee, P., Lin, D.L., McMullan, L.K., Shrivastava-Ranjan, P., Bergeron, É., Lo, M.K.,  
497 Welch, S.R., Nichol, S.T., Tai, A.W., et al. (2019). A genome-wide CRISPR screen identifies N-  
498 acetylglucosamine-1-phosphate transferase as a potential antiviral target for Ebola virus. *Nat.*  
499 *Commun.* *10*, 1–13.
- 500 Gu, Y., Cao, J., Zhang, X., Gao, H., Wang, Y., Zhang, J., Shen, G., Jiang, X., Yang, J., Zheng, X., et  
501 al. (2020). Interaction network of SARS-CoV-2 with host receptome through spike protein. *bioRxiv*.
- 502 Heaton, B.E., Trimarco, J.D., Hamele, C.E., Harding, A.T., Tata, A., Zhu, X., Tata, P.R., Smith, C.M.,  
503 and Heaton, N.S. (2020). SRSF protein kinases 1 and 2 are essential host factors for human  
504 coronaviruses including SARS-CoV-2. *bioRxiv Prepr. Serv. Biol.* 1–28.
- 505 Hoffmann, M., Kleine-Weber, H., Schroeder, S., Krüger, N., Herrler, T., Erichsen, S., Schiergens,  
506 T.S., Herrler, G., Wu, N.H., Nitsche, A., et al. (2020). SARS-CoV-2 Cell Entry Depends on ACE2 and  
507 TMPRSS2 and Is Blocked by a Clinically Proven Protease Inhibitor. *Cell* 1–10.
- 508 Horby, P., Lim, W.S., Emberson, J., Mafham, M., Bell, J., Linsell, L., Staplin, N., Brightling, C.,  
509 Ustianowski, A., Elmahi, E., et al. (2020). Effect of Dexamethasone in Hospitalized Patients with  
510 COVID-19: Preliminary Report. *N. Engl. J. Med.*
- 511 Jeong, H., Kim, S.Y., Rousseaux, M.W.C., Zoghbi, H.Y., and Liu, Z. (2018). CRISPRcloud2: A

512 cloud-based platform for deconvoluting CRISPR screen data. bioRxiv.

513 Klein, Z.A., Takahashi, H., Ma, M., Stagi, M., Zhou, M., Lam, T.T., Strittmatter, S.M., Klein, Z.A.,  
514 Takahashi, H., Ma, M., et al. (2017). Loss of TMEM106B Ameliorates Lysosomal and  
515 Frontotemporal Dementia-Related Phenotypes in Article Loss of TMEM106B Ameliorates Lysosomal  
516 and Frontotemporal Dementia-Related Phenotypes in Progranulin-Deficient Mice. *Neuron* 95, 281–  
517 296.e6.

518 Li, B., Clohisey, S.M., Chia, B.S., Wang, B., Cui, A., Eisenhaure, T., Schweitzer, L.D., Hoover, P.,  
519 Parkinson, N.J., Nachshon, A., et al. (2020). Genome-wide CRISPR screen identifies host dependency  
520 factors for influenza A virus infection. *Nat. Commun.* 11.

521 Liu, D.X., Liang, J.Q., and Fung, T.S. (2020). Human Coronavirus-229E, -OC43, -NL63, and -HKU1.  
522 Ref. Modul. Life Sci.

523 Morita, K., Hama, Y., Izume, T., Tamura, N., Ueno, T., Yamashita, Y., Sakamaki, Y., Mimura, K.,  
524 Morishita, H., Shihoya, W., et al. (2018). Genome-wide CRISPR screen identifies TMEM41B as a  
525 gene required for autophagosome formation. *J. Cell Biol.* 217, 3817–3828.

526 Nicholson, A.M., and Rademakers, R. (2016). What we know about TMEM106B in  
527 neurodegeneration. *Acta Neuropathol.* 132, 639–651.

528 Ou, X., Liu, Y., Lei, X., Li, P., Mi, D., Ren, L., Guo, L., Guo, R., Chen, T., Hu, J., et al. (2020).  
529 Characterization of spike glycoprotein of SARS-CoV-2 on virus entry and its immune cross-reactivity  
530 with SARS-CoV. *Nat. Commun.* 11.

531 Pasquier, B., El-Ahmad, Y., Filoche-Rommé, B., Dureuil, C., Fassy, F., Abecassis, P.Y., Mathieu, M.,  
532 Bertrand, T., Benard, T., Barrière, C., et al. (2015). Discovery of (2 S)-8-[(3 R)-3-Methylmorpholin-4-  
533 yl]-1-(3-methyl-2-oxobutyl)-2-(trifluoromethyl)-3,4-dihydro-2 H -pyrimido[1,2- a ]pyrimidin-6-one:  
534 A novel potent and selective inhibitor of Vps34 for the treatment of solid tumors. *J. Med. Chem.* 58,  
535 376–400.

536 Robke, L., Laraia, L., Carnero Corrales, M.A., Konstantinidis, G., Muroi, M., Richters, A., Winzker,

- 537 M., Engbring, T., Tomassi, S., Watanabe, N., et al. (2017). Phenotypic Identification of a Novel  
538 Autophagy Inhibitor Chemotype Targeting Lipid Kinase VPS34. *Angew. Chemie - Int. Ed.* *56*, 8153–  
539 8157.
- 540 Ronan, B., Flamand, O., Vescovi, L., Dureuil, C., Durand, L., Fassy, F., Bachelot, M.-F., Lambertson,  
541 A., Mathieu, M., Bertrand, T., et al. (2014). A highly potent and selective Vps34 inhibitor alters  
542 vesicle trafficking and autophagy. *Nat. Chem. Biol.* *10*, 1013–1019.
- 543 Shang, J., Wan, Y., Luo, C., Ye, G., Geng, Q., Auerbach, A., and Li, F. (2020). Cell entry mechanisms  
544 of SARS-CoV-2. *Proc. Natl. Acad. Sci. U. S. A.* *117*.
- 545 Silvas, J.A., Jureka, A.S., Nicolini, A.M., Chvatal, S.A., and Basler, C.F. (2020). Inhibitors of VPS34  
546 and lipid metabolism suppress SARS-CoV-2 replication. *bioRxiv* *30307*.
- 547 Vijgen, L., Keyaerts, E., Moës, E., Maes, P., Duson, G., and Van Ranst, M. (2005). Development of  
548 one-step, real-time, quantitative reverse transcriptase PCR assays for absolute quantitation of human  
549 coronaviruses OC43 and 229E. *J. Clin. Microbiol.* *43*, 5452–5456.
- 550 Wei, J., Alfajaro, M., Hanna, R., DeWeirdt, P., Strine, M., Lu-Culligan, W., Zhang, S., Graziano, V.,  
551 Schmitz, C., Chen, J., et al. (2020). Genome-wide CRISPR screen reveals host genes that regulate  
552 SARS-CoV-2 infection. *bioRxiv* *2020.06.16.155101*.
- 553 Ye, Z.W., Yuan, S.F., Yuen, K.S., Fung, S.Y., Chan, C.P., and Jin, D.Y. (2020). Zoonotic origins of  
554 human coronaviruses. *Int. J. Biol. Sci.* *16*, 1686–1697.
- 555 Zhou, P., Yang, X., Lou, Wang, X.G., Hu, B., Zhang, L., Zhang, W., Si, H.R., Zhu, Y., Li, B., Huang,  
556 C.L., et al. (2020). A pneumonia outbreak associated with a new coronavirus of probable bat origin.  
557 *Nature* *579*, 270–273.
- 558 Zhu, N., Wang, W., Liu, Z., Liang, C., Wang, W., Ye, F., Huang, B., Zhao, L., Wang, H., Zhou, W., et  
559 al. Morphogenesis and cytopathic effect of SARS-CoV-2 infection in human airway epithelial cells.  
560 *Nat. Commun.* 1–8.
- 561 Zhu, Y., Feng, F., Hu, G., Wang, Y., Yu, Y., Zhu, Y., and Xu, W. (2020). The S1 / S2 boundary of

562 SARS-CoV-2 spike protein modulates cell entry pathways and transmission. bioRxiv.

563
